# Supplementary material for: A biopolymeric buffer layer improves device efficiency and stability in inverted organic solar cells
Source: Royal Society of Chemistry journal article supplement (doi:10.1039/d0tc03048a), 2020-01-01
Supplement: d0tc03048a1.pdf [file d0tc03048a1.pdf]

## Supplementary Information

### A biopolymeric buffer layer improves device efficiency and stability in inverted organic solar cells

Nafees Ahmad<sup>ab</sup>, Li Yanxun<sup>ab</sup>, Xuning Zhang<sup>c</sup>, Boxin Wang<sup>ab</sup>, Yuan Zhang<sup>\*c</sup>, Huiqiong Zhou<sup>\*a</sup>

<sup>a</sup>CAS Key Laboratory of Nanosystem and Hierarchical Fabrication, CAS Center for Excellence in Nanoscience, National Center for Nanoscience and Technology, Beijing 100190, P. R. China. Email: [zhouhq@nanoctr.cn](mailto:zhouhq@nanoctr.cn)

<sup>b</sup>University of Chinese Academy of Sciences, Beijing 100049, P. R. China

<sup>c</sup>School of Chemistry, Beijing Advanced Innovation Center for Biomedical Engineering, Beihang University, Beijing 100191, P. R. China. [yuanzhang@buaa.edu.cn](mailto:yuanzhang@buaa.edu.cn)

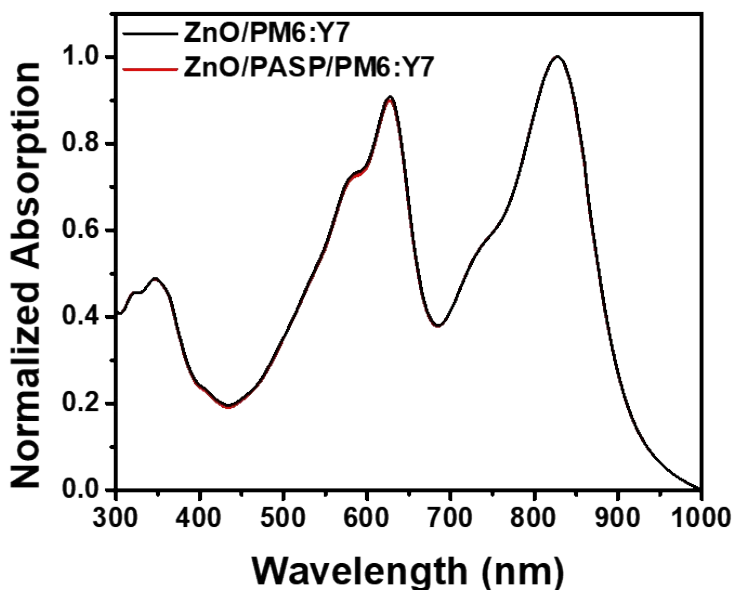

Fig. S1. Normalized absorption spectra of PM6:Y7 blend films coated on ZnO and ZnO/PASP ETLs.

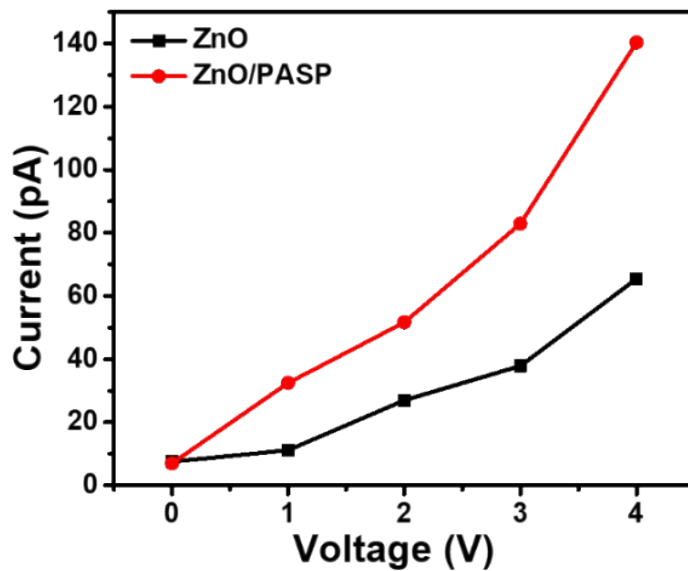

**Fig. S2.** Current versus voltage curves measured on ZnO, ZnO/PASP films with conductive-atomic force microscopy (c-AFM) using Ti/Ir coated tips at contact mode.

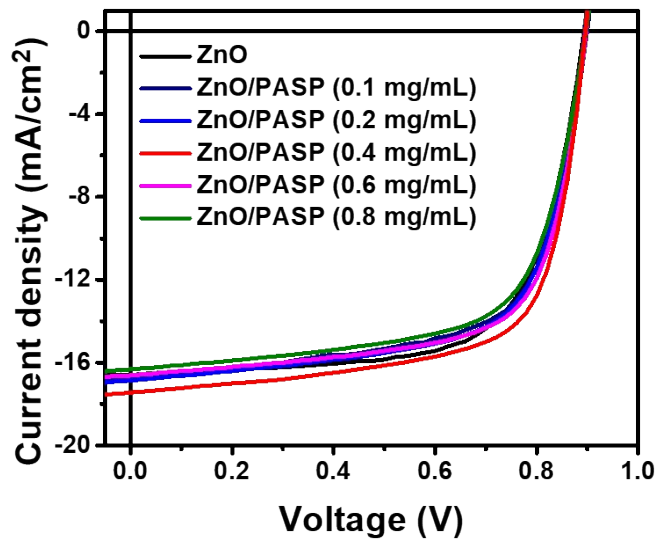

**Fig. S3.** Current density versus voltage ( $J$ - $V$ ) characteristics PBDT-ITIC solar cells with ZnO and ZnO/PASP ETLs under AM 1.5 G solar irradiation ( $100 \text{ mW/cm}^2$ ).

**Table. S1.** Photovoltaic parameters of PBDBT: ITIC devices based on ZnO and ZnO/PASP ETLs with different

| ETL      | Conc.      | Voc [V]     | Jsc [mA/cm <sup>2</sup> ] | FF [%]       | PCE [%]     |
|----------|------------|-------------|---------------------------|--------------|-------------|
| ZnO      |            | 0.88        | 16.61                     | 68.93        | 10.1        |
| ZnO/PASP | 0.1        | 0.88        | 16.98                     | 65.06        | 9.7         |
| ZnO/PASP | 0.2        | 0.88        | 16.87                     | 68.55        | 10.1        |
| ZnO/PASP | <b>0.4</b> | <b>0.88</b> | <b>17.35</b>              | <b>70.30</b> | <b>10.7</b> |
| ZnO/PASP | 0.6        | 0.88        | 16.62                     | 69.83        | 10.2        |
| ZnO/PASP | 0.8        | 0.88        | 16.32                     | 67.39        | 9.6         |

concentration.

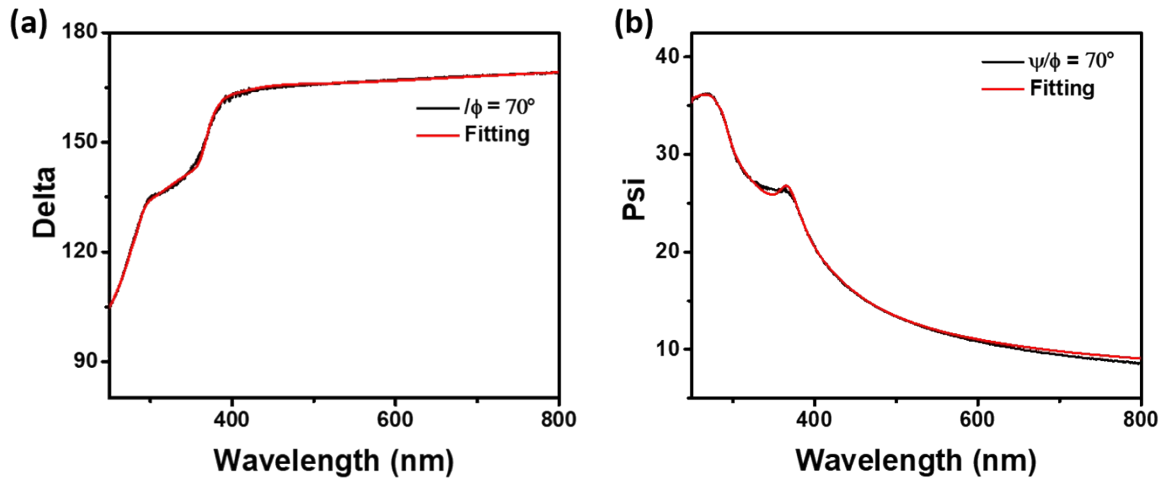

**Fig. S4.** Parameters (a) delta and (b) Psi used for the ellipsometry to determine the thickness of PASP thin layer.

**Fig. S5.** EQE spectra of PBDBT:ITIC based on ZnO and ZnO/PASP interlayers.

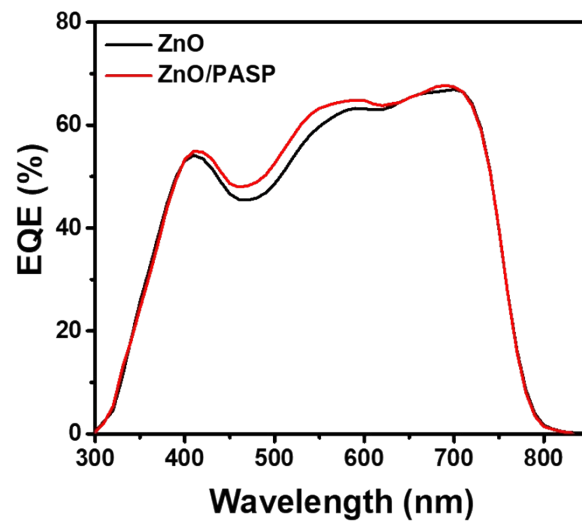

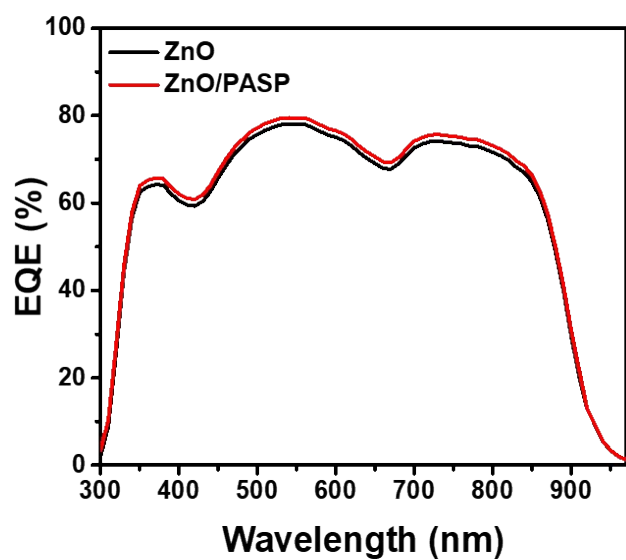

Fig. S6. EQE spectra of PM6:Y7 based on ZnO and ZnO/PASP interlayers.

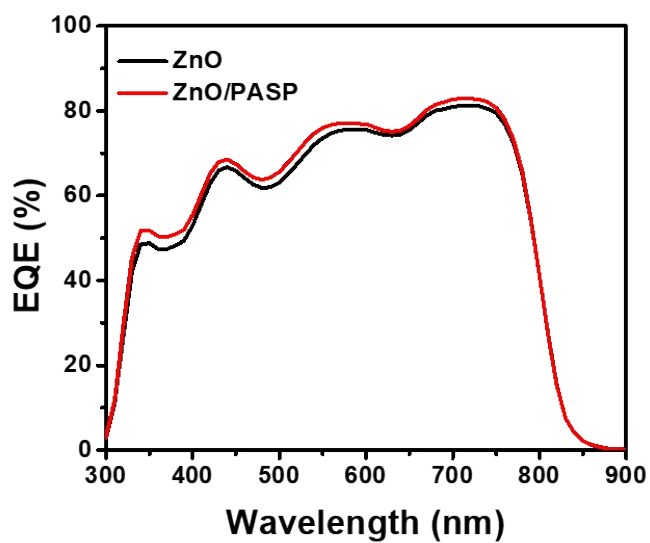

Fig. S7. EQE spectra of PBDBT2F:IT4F based on ZnO and ZnO/PASP interlayers.

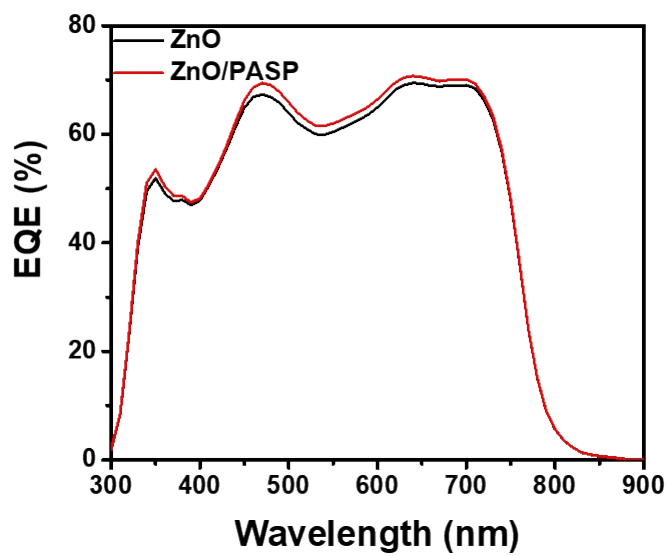

Fig S8. EQE spectra of PTB7-Th:PC<sub>71</sub>BM devices with ZnO and ZnO/PASP interlayers.

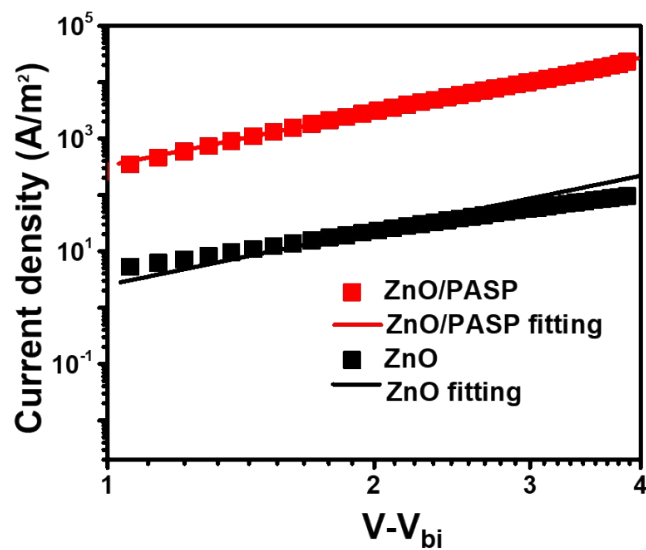

Fig. S9. Dark  $J$ - $V$  characteristics of electron-only devices in configuration of ITO/(ZnO or ZnO/PASP)/BHJ/Al (BHJ is PM6:Y7).
